# Supplementary material
Source: PubMed Central journal article supplement (PMC6682096)
Supplement: ao9b01433_si_001.pdf [file ao9b01433_si_001.pdf]

**Title:** Rubrofusarin as a Dual Protein Tyrosine Phosphate 1B and Human Monoamine Oxidase-A Inhibitor: An In Vitro and In Silico Study

Authors: Pradeep Paudel<sup>1</sup>, Su Hui Seong<sup>1</sup>, Hyun Ah Jung<sup>2, \*</sup> and Jae Sue Choi<sup>1, \*</sup>

**Affiliation:**

<sup>1</sup> Department of Food and Life Science, Pukyong National University, Busan 48513, Republic of Korea

<sup>2</sup> Department of Food Science and Human Nutrition, Chonbuk National University, Jeonju 54896, Republic of Korea

\* Correspondence: [jungha@jbnu.ac.kr](mailto:jungha@jbnu.ac.kr) (H.A.J.); [choijs@pknu.ac.kr](mailto:choijs@pknu.ac.kr) (J.S.C.); Tel.: +82-63-270-4882 (H.A.J.); +82-51-629-5845 (J.S.C.).

**Supplementary Table 1.** Drug-likeness and ADME characteristics as determined by PreADMET.

| compounds    | drug-likeness  |                 | ADME characteristics              |                  |                  |                                                   |                                                     |                                                        |
|--------------|----------------|-----------------|-----------------------------------|------------------|------------------|---------------------------------------------------|-----------------------------------------------------|--------------------------------------------------------|
|              | MDDR-like rule | Lipinski's rule | Log P <sub>o/w</sub> <sup>a</sup> | PPB <sup>b</sup> | HIA <sup>c</sup> | in vitro Caco2 permeability (nm/sec) <sup>d</sup> | in vitro MDCK cell permeability (nm/s) <sup>e</sup> | in vivo BBB penetration ([brain]/[blood]) <sup>f</sup> |
| rubrofusarin | mid-structure  | suitable        | 2.89                              | 85.78%           | 93.22%           | 19.31                                             | 45.39                                               | 0.64                                                   |
| <b>2</b>     | drug-like      | violated        | -0.85                             | 34.48%           | 13.23%           | 9.89                                              | 0.32                                                | 0.03                                                   |

<sup>a</sup> The log of the coefficient of solvent partitioning between 1-octanol and water.

<sup>b</sup> Plasma protein binding (PPB) (< 90% represents weak binding and > 90% represents strong binding).

<sup>c</sup> Human intestinal absorption (HIA) (0-20% is poorly absorbed, 20-70% is moderately absorbed and 70-100% is well-absorbed).

<sup>d</sup> 0-10 nm/sec is low permeability, 10-100 nm/sec is medium permeability and > 100 nm/sec is high permeability.

<sup>e</sup> Permeability across MDCK cells.

<sup>f</sup> < 0.1 is low absorption by the central nervous system, 0.1-2.0 is middle absorption and > 2.0 is high absorption.

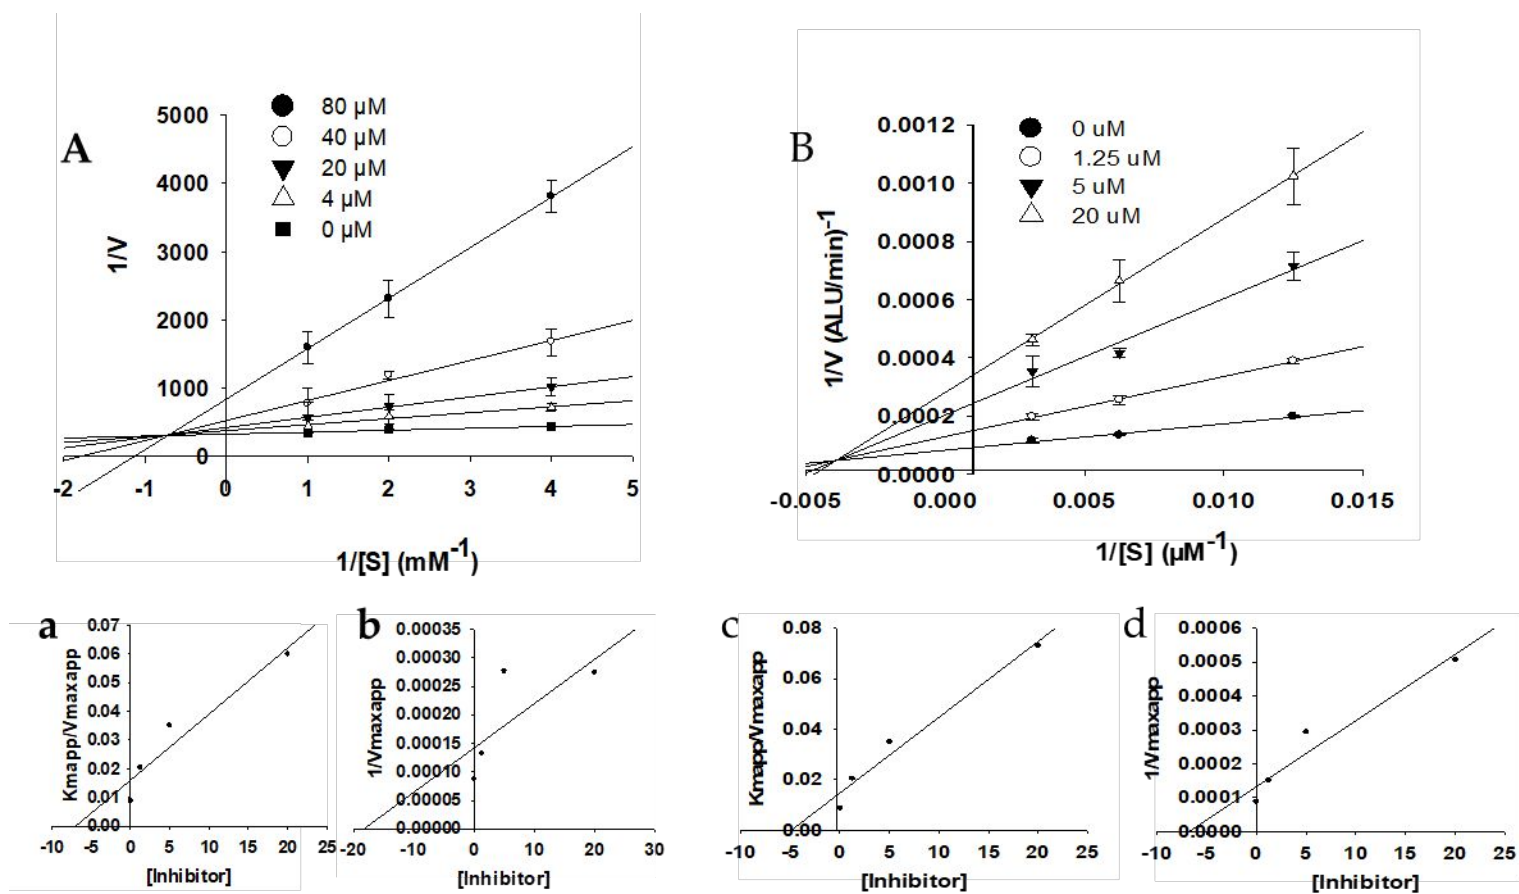

**Figure S1.** Lineweaver-Burk plots for PTP1B (A) and *h*MAO-A (B) inhibition by rubrofusarin. PTP1B inhibition was tested in the presence of 0.25 mM, 0.5 mM and 1 mM concentrations of substrate, *p*NPP. *h*MAO-A inhibition was tested with 80, 160 and 320  $\mu\text{M}$  *h*MAO substrate. Graphs below Lineweaver-Burk plots represent secondary plots for PTP1B (a and b) and *h*MAO-A (c and d) inhibition by rubrofusarin.
